# Supplementary material for: Macroporous poly(ionic liquid)/ionic liquid gels via CO2-based emulsion-templating polymerization
Source: Royal Society of Chemistry journal article supplement (doi:10.1039/c7py01952a), 2017-12-14
Supplement: c7py01952a1.pdf [file c7py01952a1.pdf]

## ELECTRONIC SUPPORTING INFORMATION

### Macroporous Poly(ionic liquid)/Ionic Liquid Gels via CO<sub>2</sub>-based Emulsion-Templating Polymerization.

K. Mathieu, C. Jérôme and A. Debuigne\*

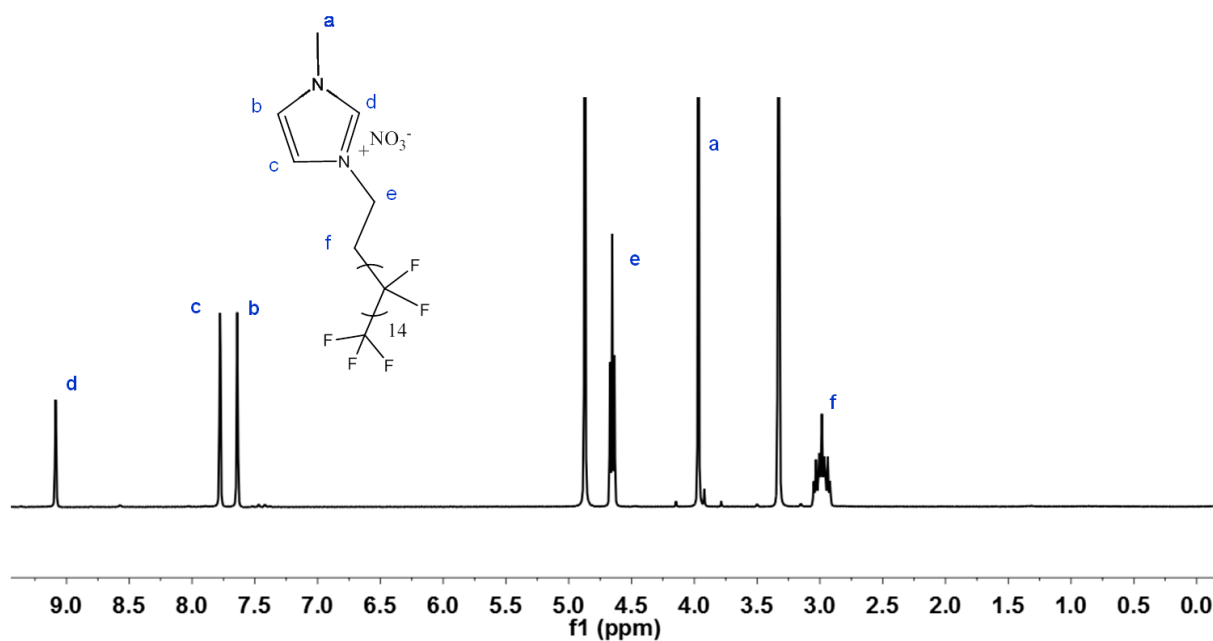

**Figure S1.** <sup>1</sup>H NMR spectra of [OctF<sub>17</sub>MeIm][NO<sub>3</sub>] in MeOD.

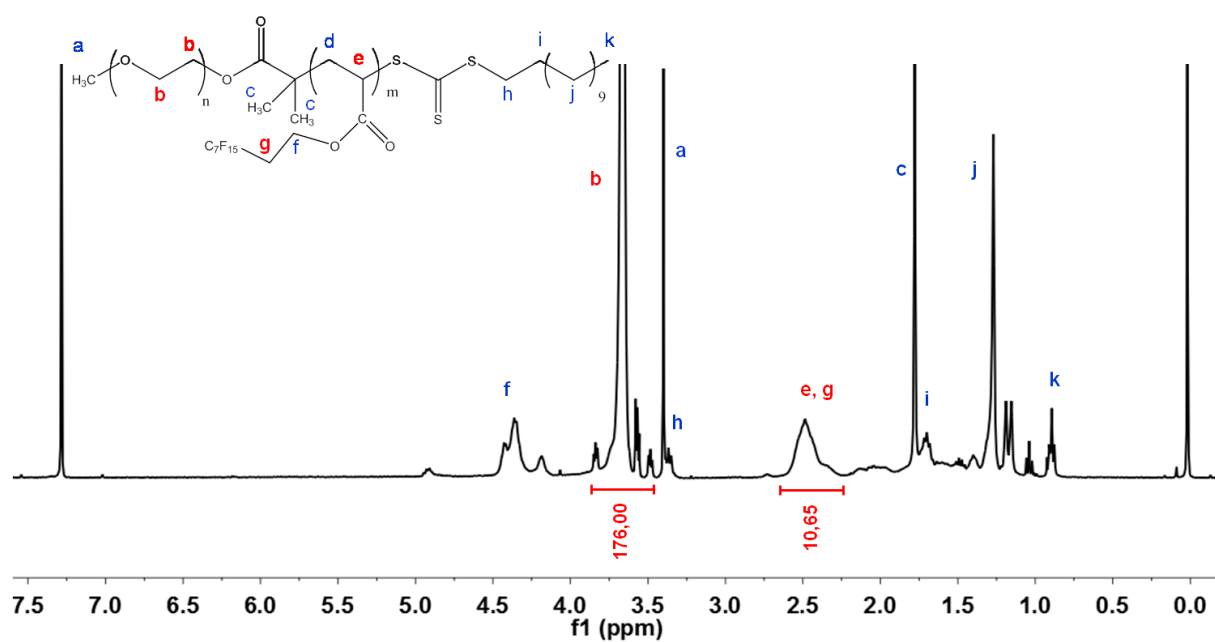

**Figure S2.**  $^1\text{H}$  NMR spectra of,  $\text{PEO}_{2K}\text{-}b\text{-PFDA}_{1.8K}$  in  $\text{CDCl}_3$ . Values of integrals used for the determination of the molar mass of the PFDA block are indicated in red

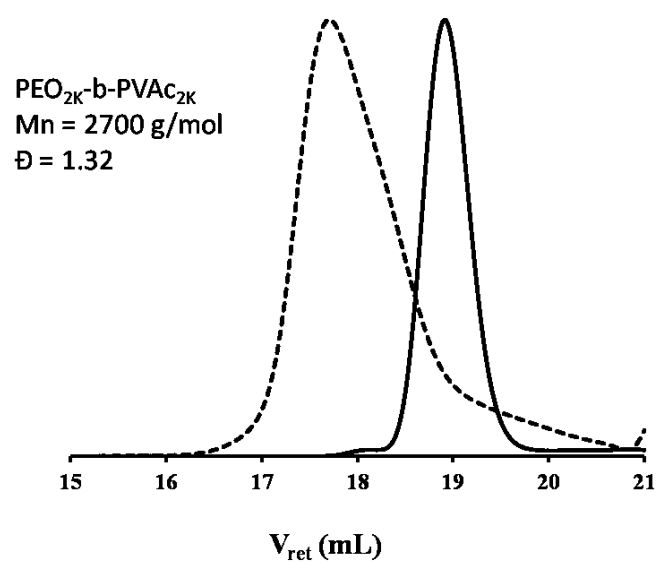

**Figure S3.** SEC chromatograms (calibration PEO) in THF of PEO<sub>2K</sub> (full line) and PEO<sub>2K</sub>-*b*-PVAc<sub>2K</sub> (dotted line).

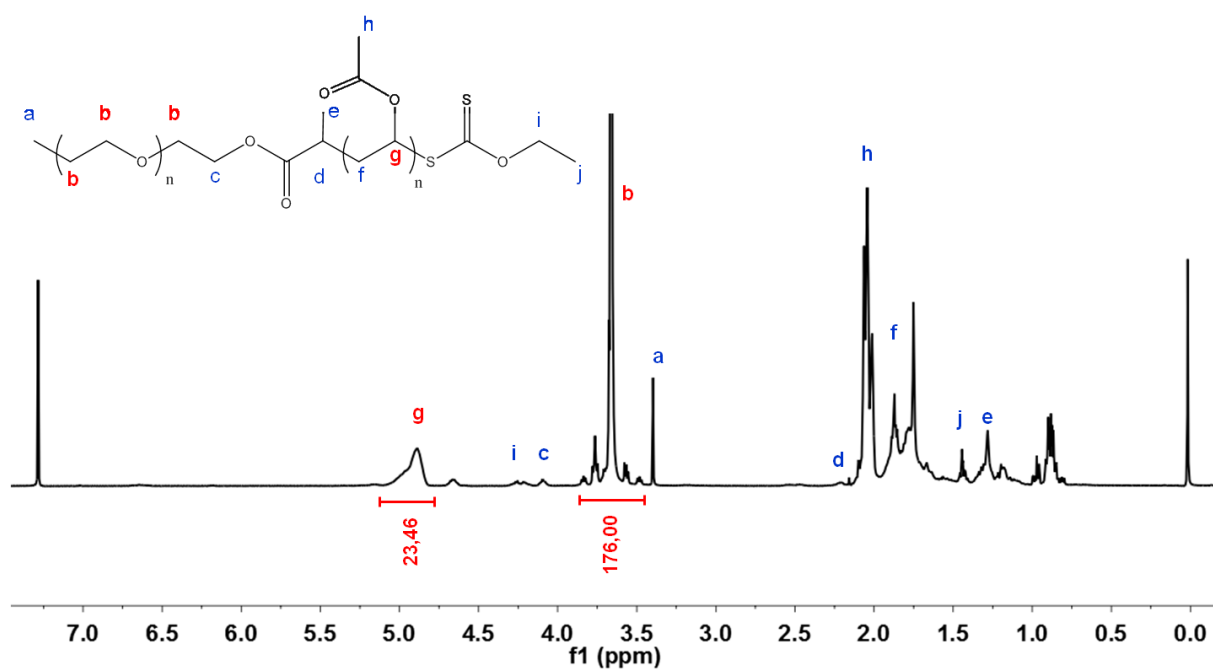

**Figure S4.**  $^1\text{H}$  NMR spectra of,  $\text{PEO}_{2K}\text{-}b\text{-PVAc}_{2K}$  in  $\text{CDCl}_3$ . Values of integrals used for the determination of the molar mass of the PVAc block are indicated in red.

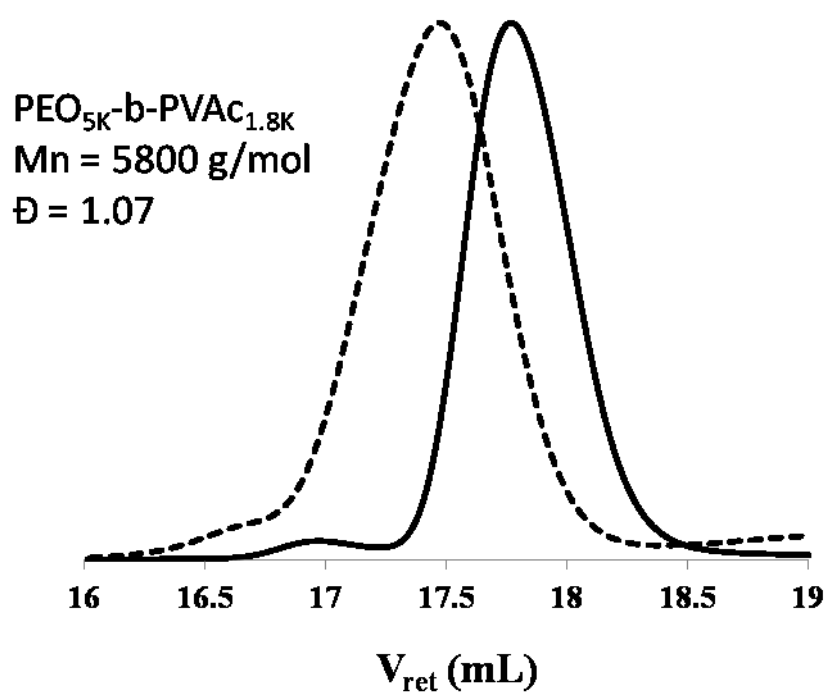

**Figure S5.** SEC chromatograms (calibration PEO) in THF of PVAc<sub>5K</sub> (full line) and PEO<sub>5K</sub>-*b*-PVAc<sub>1.8K</sub> (dotted line).

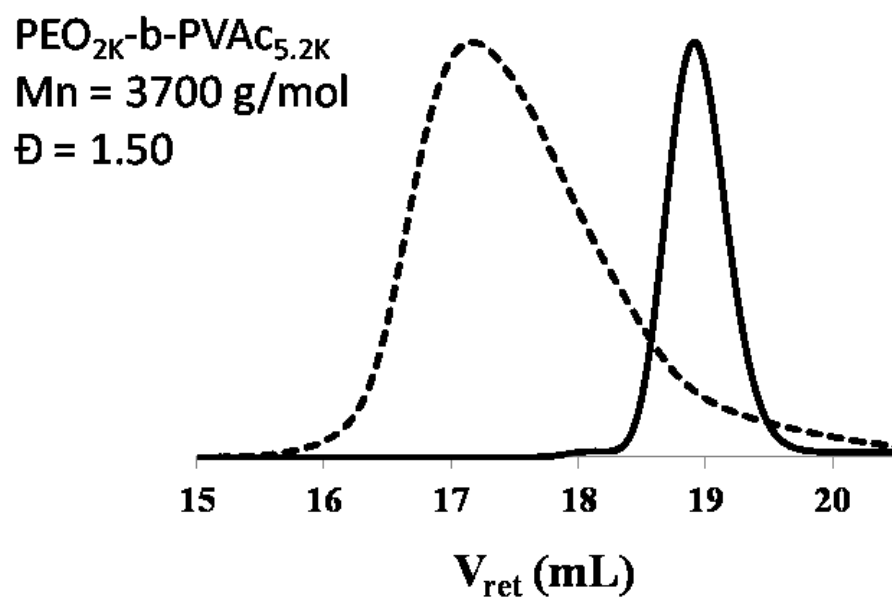

**Figure S6.** SEC chromatograms (calibration PEO) in THF of PVAc<sub>2K</sub> (full line) and PEO<sub>2K</sub>-*b*-PVAc<sub>5.2K</sub> (dotted line).

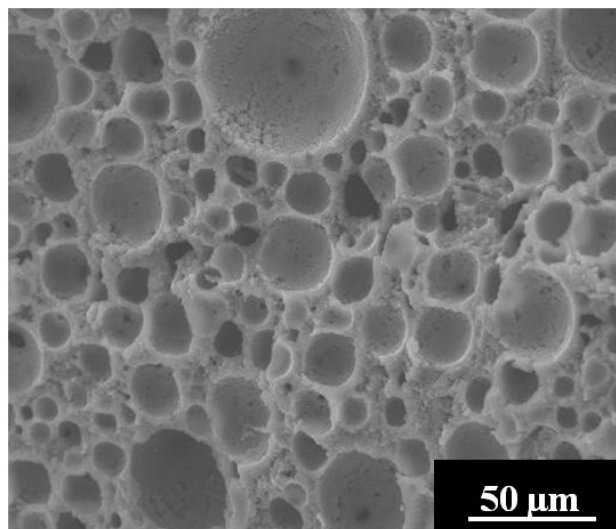

**Figure S7.** SEM pictures of PILs/ILs gel obtained after the polymerization of [OctVIm][Br] and [C<sub>6</sub>(VIm)<sub>2</sub>][Br]<sub>2</sub> in a mixture of [OctMeIm][Br] and water at 150 bar and 40 °C and stabilized with PEO<sub>5K</sub>-*b*-PVAc<sub>1.8K</sub> (Sample **G**).
